# Supplementary material for: Mexican Oregano (Lippia berlandieri Schauer and Poliomintha longiflora Gray) Essential Oils Induce Cell Death by Apoptosis in Leishmania (Leishmania) mexicana Promastigotes
Source: MDPI journal article supplement (doi:10.3390/molecules27165183), 2022-08-15
Supplement: s1 [file s1]

# Mexican Oregano (*Lippia berlandieri* Schauer and *Poliomintha longiflora* Gray) Essential Oils Induce Cell Death by Apoptosis in *Leishmania (Leishmania) mexicana* Promastigotes

Karla Fabiola Chacón-Vargas<sup>1</sup>, Luvia Enid Sánchez-Torres<sup>2,\*</sup>, Mónica L. Chávez-González<sup>3</sup>, Jaime R. Adame-Gallegos<sup>1</sup> and Guadalupe Virginia Nevárez-Moorillón<sup>1,\*</sup>

## Supplementary files

**Table S1.** Chemical compounds identified in the essential oils of *Lippia berlandieri* and *Poliomontha longiflora*

| Compounds                        | %      |
|----------------------------------|--------|
| <i>Lippia berlandieri</i> EO     |        |
| Alpha-tujone                     | 0.049  |
| β-cis-Ocimene                    | 0.09   |
| Anisole                          | 0.259  |
| 2,5-diethyl-3,6-dimethylpyrazine | 0.64   |
| Thymol                           | 7.863  |
| Carvacrol                        | 33.781 |
| M-cymen-4-ol                     | 0.108  |
| Phenol-2-methoxy (Guaiacol)      | 0.305  |
| Adamantane,2-methyl              | 0.273  |
| Gitoxigenin                      | 0.941  |
| Alpha-eudesmol                   | 0.123  |
| <i>Poliomintha longiflora</i> EO |        |
| β-pinene                         | 0.637  |
| Durene                           | 21.064 |
| Thymol                           | 23.46  |
| Carvacrol                        | 18.35  |

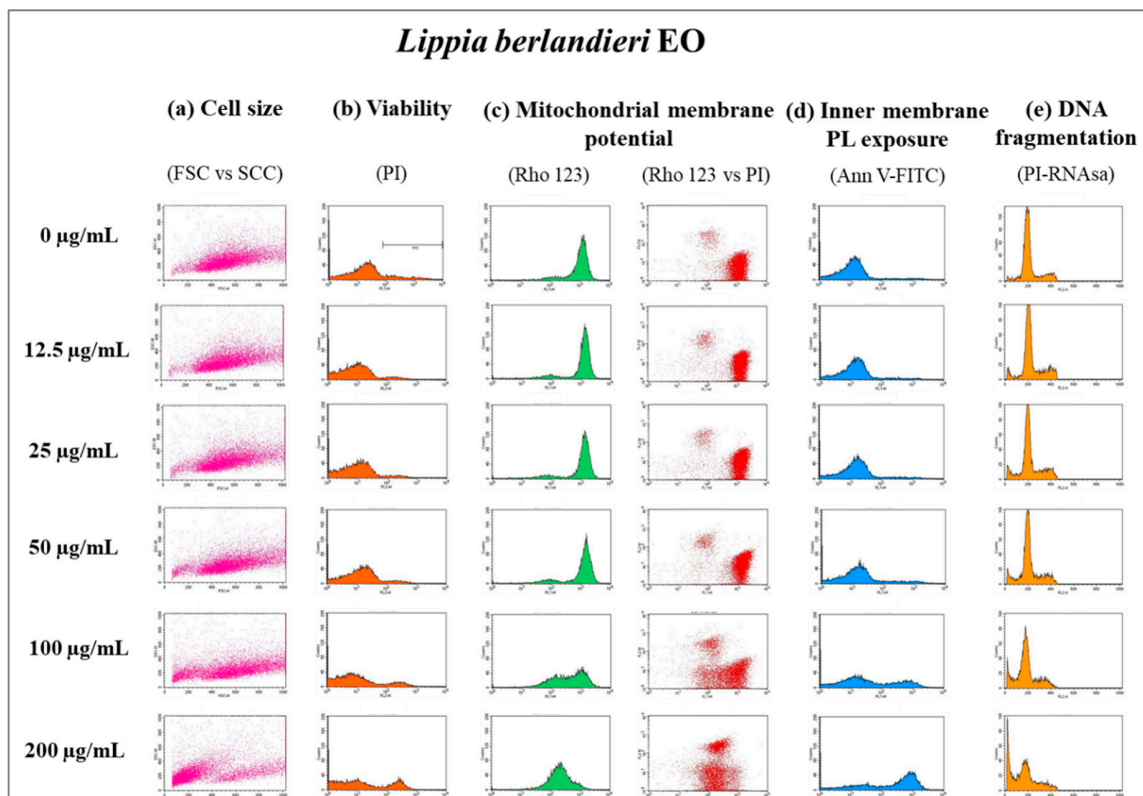

**Figure S1. Characterization of the leishmanicidal activity of *Lippia berlandieri* EO by flow cytometry.** *Leishmania mexicana* promastigotes were treated with 0, 12.5, 25, 50, 100 and 200  $\mu\text{g/mL}$  of *L. berlandieri* EO, incubated for 24 h and different markers of cell death were analyzed by flow cytometry. (a) Changes in size (FSC vs SSC); (b) Plasma membrane integrity; (c) Mitochondrial membrane potential (monoparametric and biparametric with PI analysis); (d) Inner membrane phospholipids (PL) exposure; (e) DNA fragmentation. The experiment was performed in triplicate, and representative images are shown.

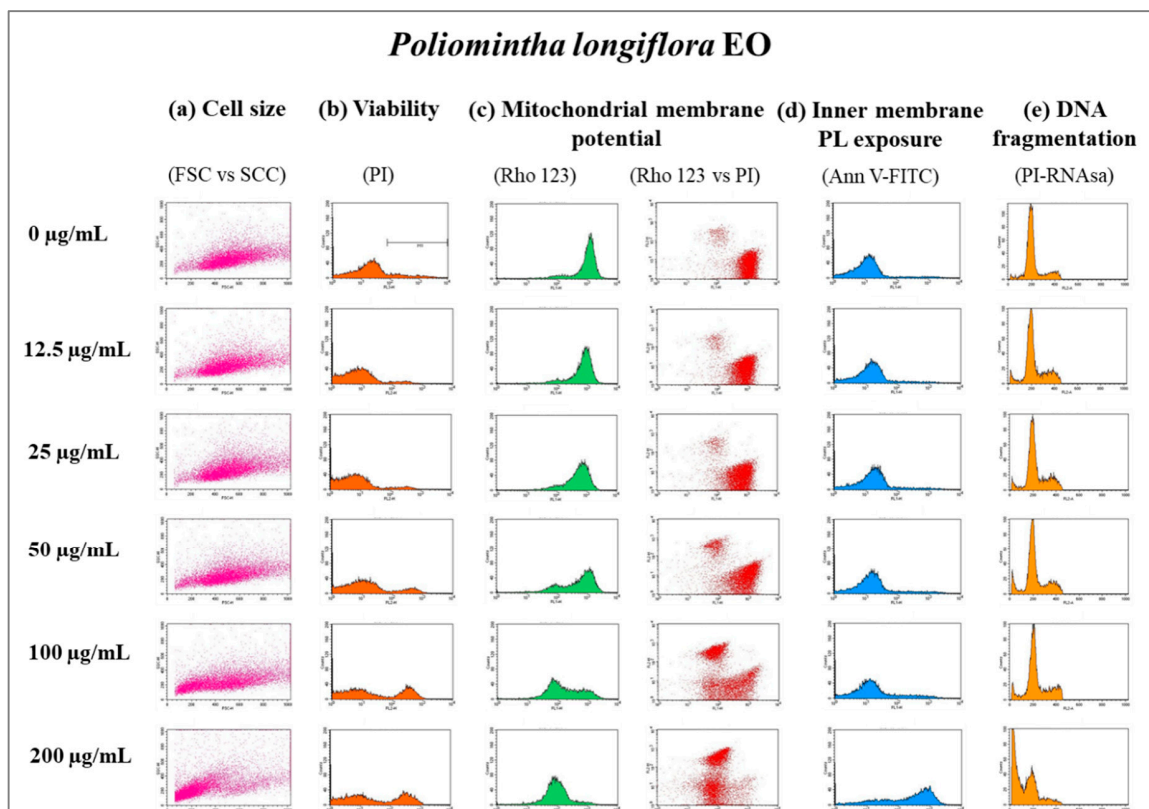

**Figure S2. Characterization of the leishmanicidal activity of *Poliomintha longiflora* EO by flow cytometry.** *Leishmania mexicana* promastigotes were treated with 0, 12.5, 25, 50, 100 and 200  $\mu\text{g/mL}$  of *P. longiflora* EO, incubated for 24 h and different markers of cell death were analyzed by flow cytometry. (a) Changes in size (FSC vs SSC); (b) Plasma membrane integrity; (c) Mitochondrial membrane potential (monoparametric and biparametric with PI analysis); (d) Inner membrane phospholipids (PL) exposure; (e) DNA fragmentation. The experiment was performed in triplicate, and representative images are shown.

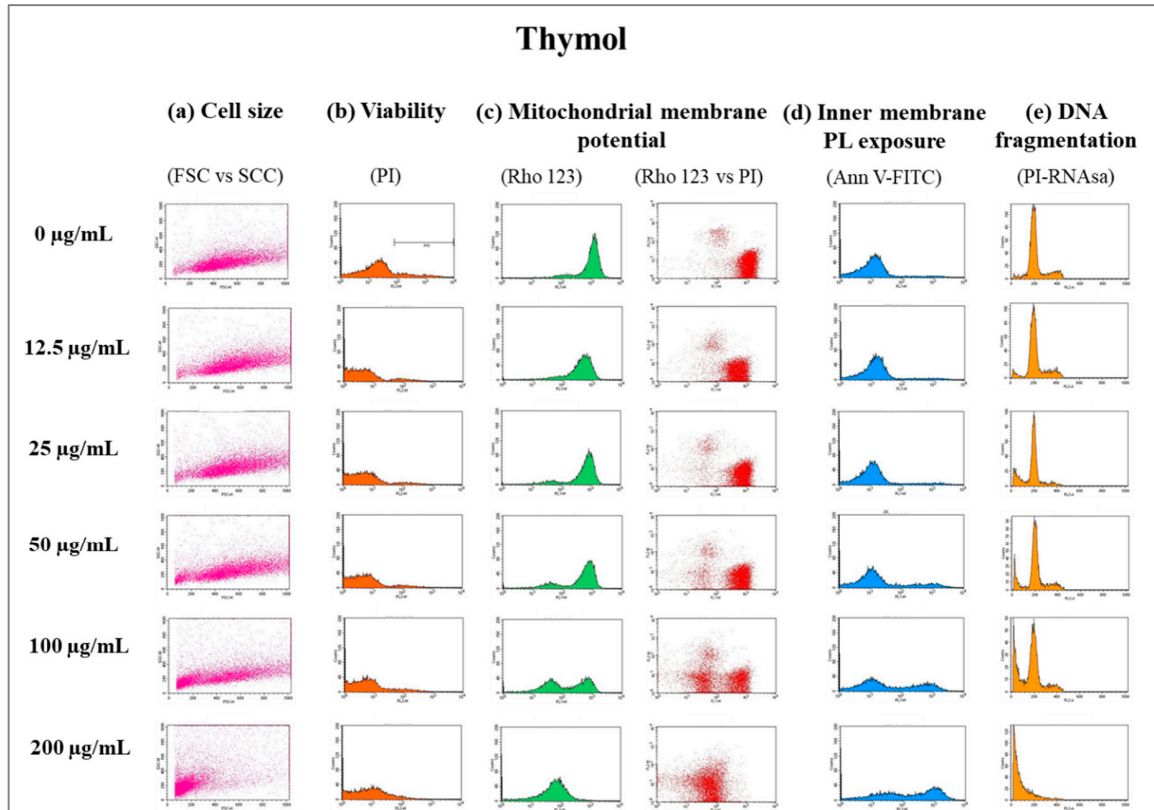

**Figure S3. Characterization of the leishmanicidal activity of thymol by flow cytometry.** *Leishmania mexicana* promastigotes were treated with 0, 12.5, 25, 50, 100 and 200  $\mu\text{g/mL}$  of thymol incubated for 24 h and different markers of cell death were analyzed by flow cytometry. a) Changes in size (FSC vs SSC); b) Plasma membrane integrity; d) Mitochondrial membrane potential (monoparametric and biparametric with PI analysis); c) Inner membrane phospholipids (PL) exposure; (e) DNA fragmentation. The experiment was performed in triplicate, and representative images are shown.

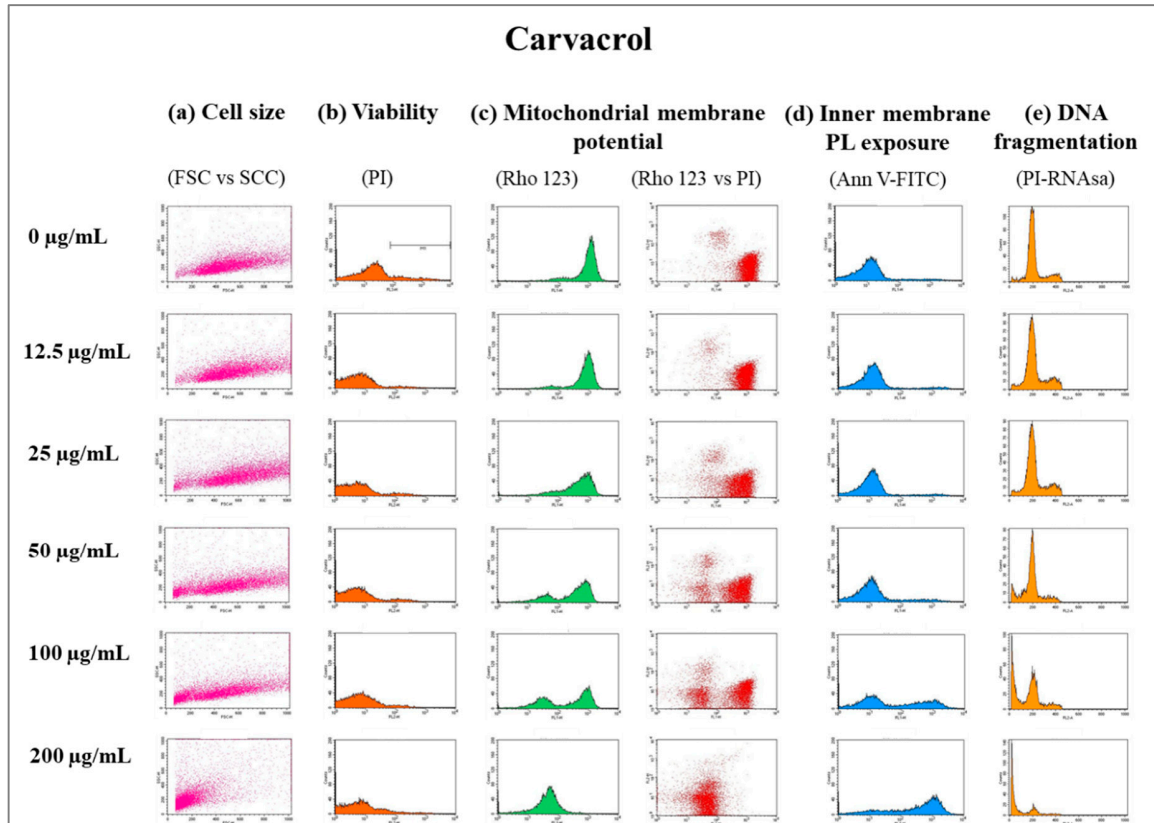

**Figure S4. Characterization of the leishmanicidal activity of carvacrol by flow cytometry.** *Leishmania mexicana* promastigotes were treated with 0, 12.5, 25, 50, 100 and 200  $\mu\text{g/mL}$  of carvacrol, incubated for 24 h and different markers of cell death were analyzed by flow cytometry. a) Changes in size (FSC vs SSC); b) Plasma membrane integrity; d) Mitochondrial membrane potential (monoparametric and biparametric with PI analysis); c) Inner membrane phospholipids (PL) exposure; (e) DNA fragmentation. The experiment was performed in triplicate, and representative images are shown.
